# Supplementary material for: Azide-mediated unusualin situtransformation of Mannich base to Schiff–Mannich base and isolation of their Cu(ii) complexes: crystal structure, theoretical inspection and anticancer activities
Source: Royal Society of Chemistry journal article supplement (doi:10.1039/d1dt01740c), 2021-01-01
Supplement: d1dt01740c1.pdf [file d1dt01740c1.pdf]

## SUPPORTING INFORMATION

### **Azide-mediated unusual *in situ* transformation of Mannich base to Schiff-Mannich base and isolation of their Cu(II) complexes: crystal structure, theoretical inspection and anticancer activities**

Somali Mukherjee,<sup>a</sup> Sili Hansda,<sup>a</sup> Sudeshna Nandi,<sup>b</sup> Tonmoy Chakraborty,<sup>a</sup> Debabrata Samanta,<sup>c</sup> Krishnendu Acharya,<sup>b</sup> Debasis Das<sup>a,\*</sup>

<sup>a</sup> Department of Chemistry, University of Calcutta, 92 A. P. C. Road, Kolkata 700009, India.

<sup>b</sup> Molecular and Applied Mycology and Plant Pathology Laboratory, Centre of Advanced Study, Department of Botany, University of Calcutta, 35, Ballygunge Circular Road, Kolkata 700019, India.

<sup>c</sup> Department of Chemistry, Dukhulal Nibaran Chandra (D.N.C.) College, Aurangabad, West Bengal 742201, India.

E-mail: [dasdebasis2001@yahoo.com](mailto:dasdebasis2001@yahoo.com)

### Index

| <u>Sl No.</u> | <u>Contents</u>                                                                                                                     | <u>Page No.</u> |
|---------------|-------------------------------------------------------------------------------------------------------------------------------------|-----------------|
| 1.            | <b>Fig. S1</b> <sup>1</sup> H-NMR spectrum of ligand HL <sup>1</sup> in CDCl <sub>3</sub> .                                         | S2              |
| 2.            | <b>Fig. S2</b> <sup>13</sup> C-NMR spectrum of ligand HL <sup>1</sup> in DMSO- <i>d</i> <sub>6</sub> .                              | S2              |
| 3.            | <b>Fig. S3</b> FT-IR spectrum of ligand HL <sup>1</sup> .                                                                           | S3              |
| 4.            | <b>Fig. S4</b> FT-IR spectrum of complex <b>1</b> .                                                                                 | S3              |
| 5.            | <b>Fig. S5</b> FT-IR spectrum of complex <b>2</b> .                                                                                 | S4              |
| 6.            | <b>Fig. S6</b> UV-visible spectral plot of ligand HL <sup>1</sup> .                                                                 | S4              |
| 7.            | <b>Fig. S7</b> UV-visible spectral plot of complex <b>1</b> .                                                                       | S5              |
| 8.            | <b>Fig. S8</b> UV-visible spectral plot of complex <b>2</b> .                                                                       | S5              |
| 9.            | <b>Fig. S9</b> ESI-MS spectrum of ligand HL <sup>1</sup> .                                                                          | S6              |
| 10.           | <b>Fig. S10</b> ESI-MS spectrum of complex <b>1</b> .                                                                               | S6              |
| 11.           | <b>Fig. S11</b> ESI-MS spectrum of complex <b>2</b> .                                                                               | S7              |
| 12.           | Some selected bond lengths and bond angles, and hydrogen bond parameters of complexes <b>1</b> and <b>2</b> ( <b>Table S1-S4</b> ). | S7-S9           |
| 13.           | <b>Fig. S12</b> Anti proliferative activity of ligand HL <sup>1</sup> on A549 cell line.                                            | S9              |
| 14.           | Theoretical calculations ( <b>Table S5</b> ).                                                                                       | S10-S15         |

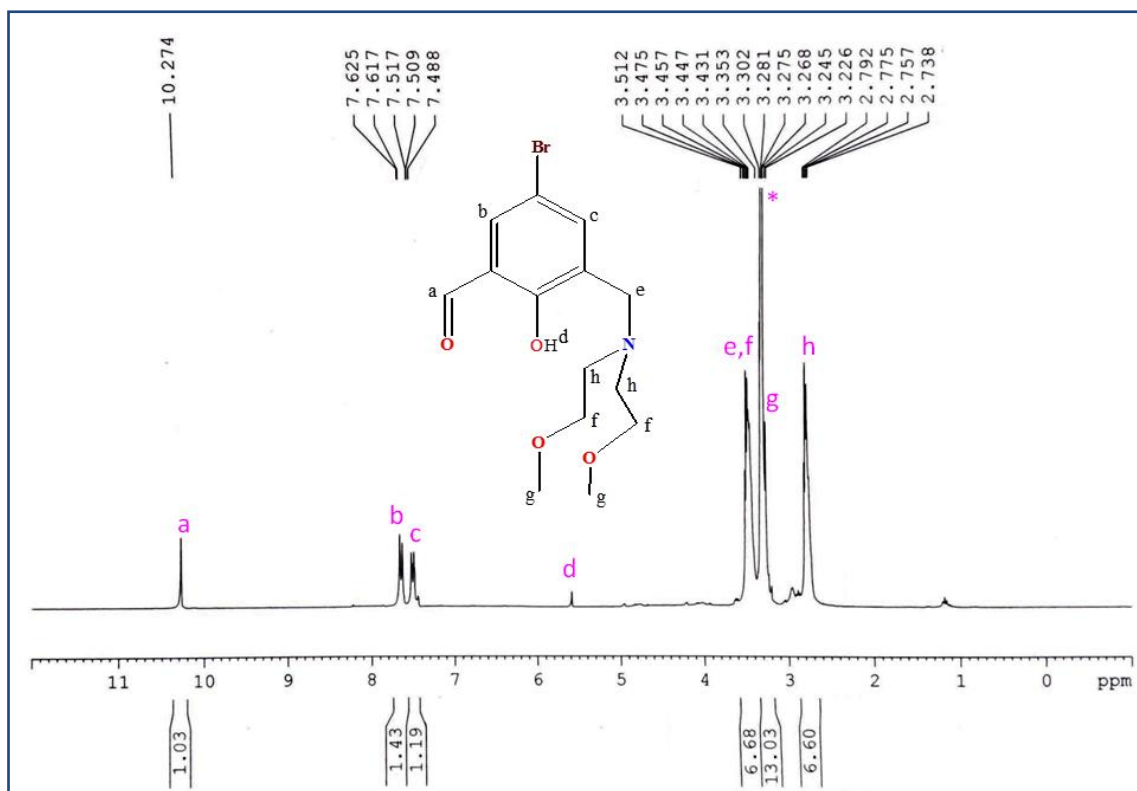

**Fig. S1** <sup>1</sup>H-NMR spectrum of ligand HL<sup>1</sup> in CDCl<sub>3</sub>.

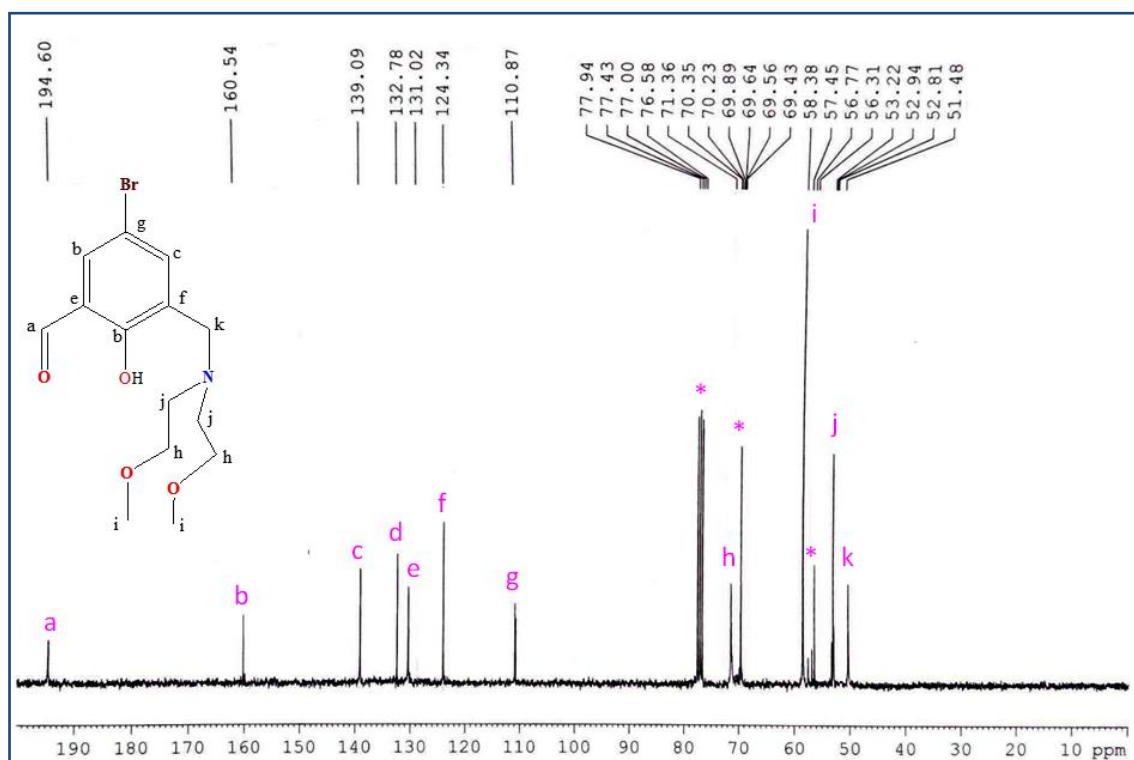

**Fig. S2** <sup>13</sup>C-NMR spectrum of ligand HL<sup>1</sup> in DMSO-*d*<sub>6</sub>.

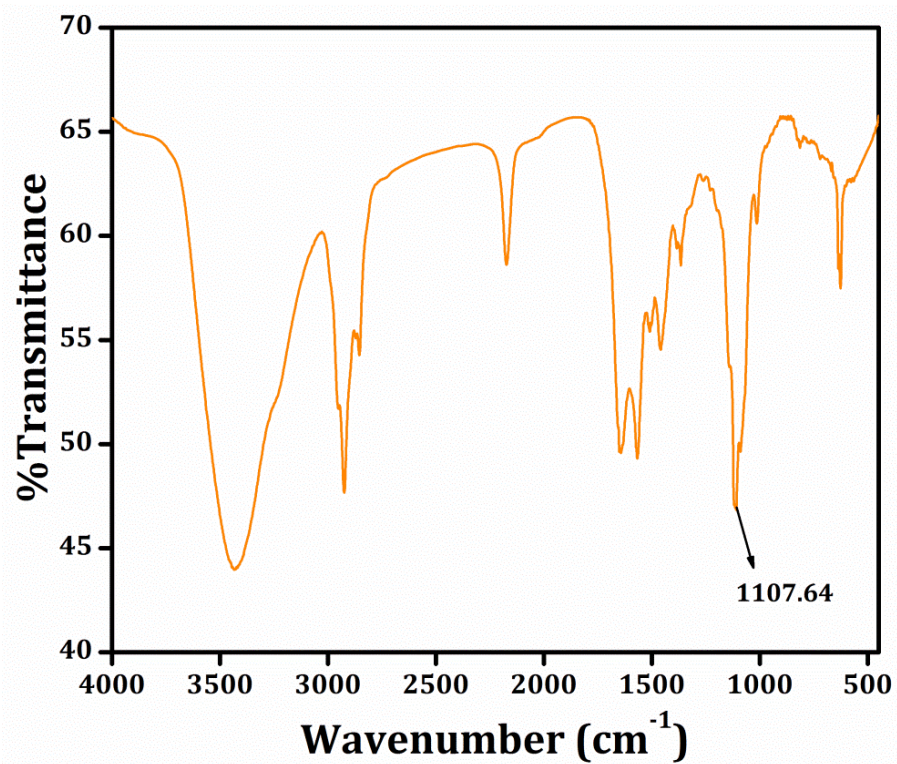

Fig. S3 FT-IR spectrum of ligand HL<sup>1</sup>.

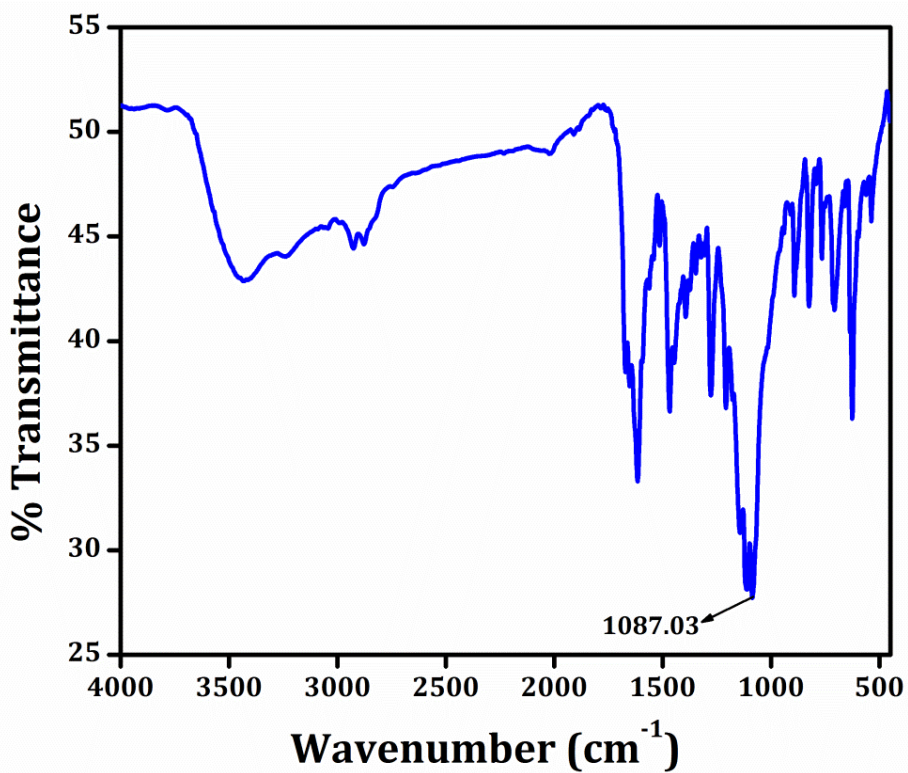

Fig. S4 FT-IR spectrum of complex 1.

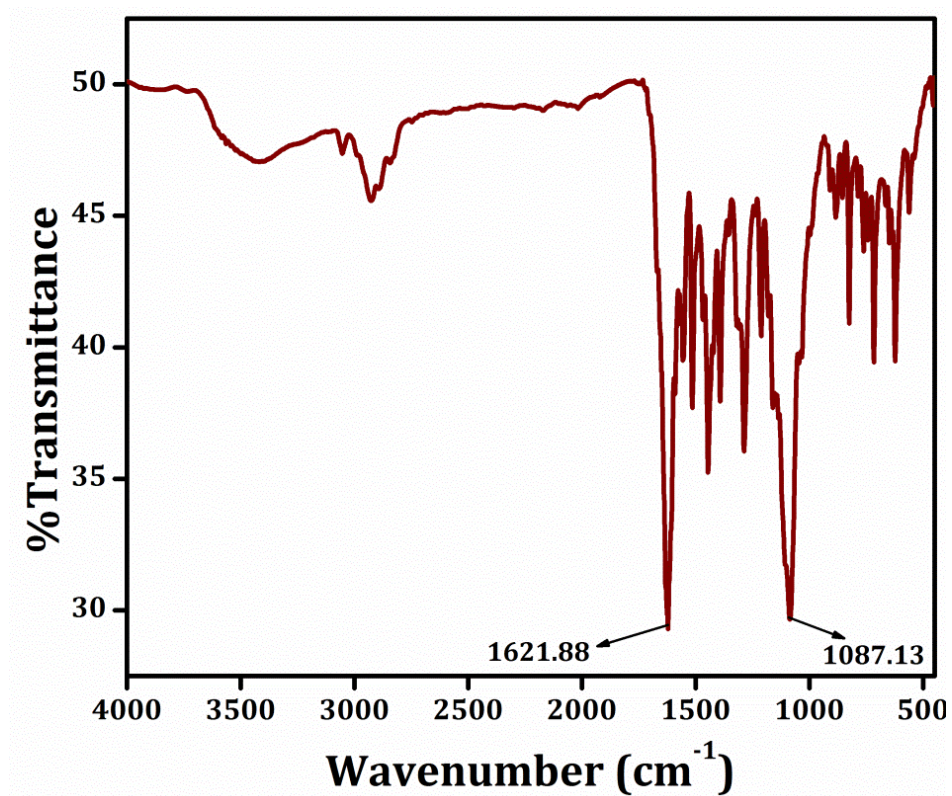

Fig. S5 FT-IR spectrum of complex 2.

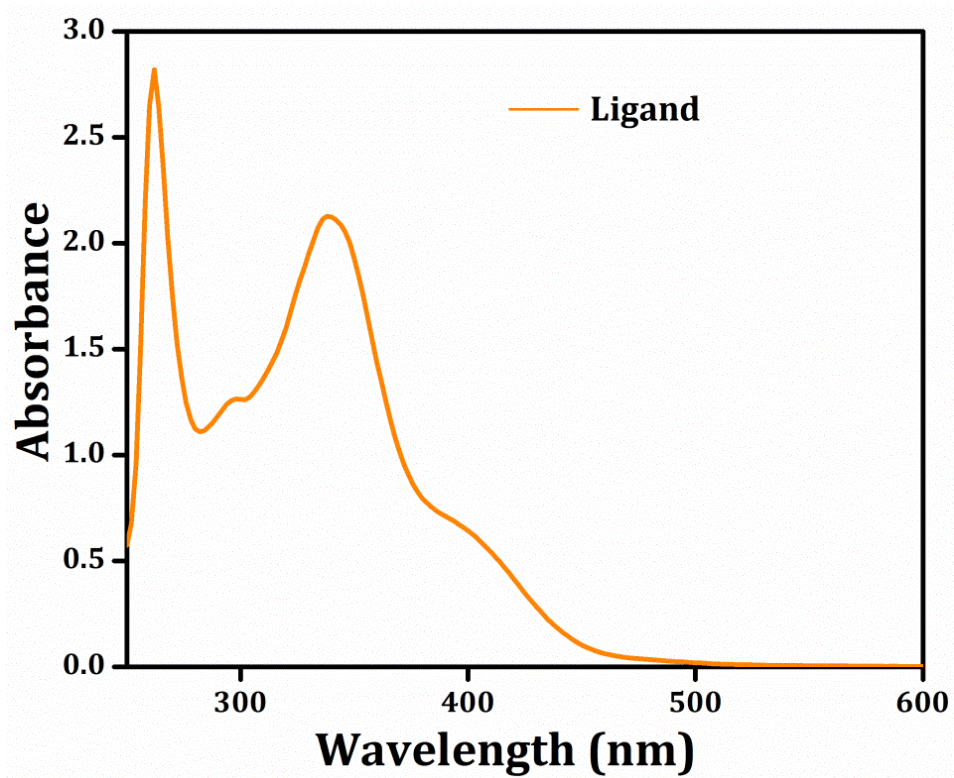

Fig. S6 UV-visible spectral plot of ligand HL<sup>1</sup>.

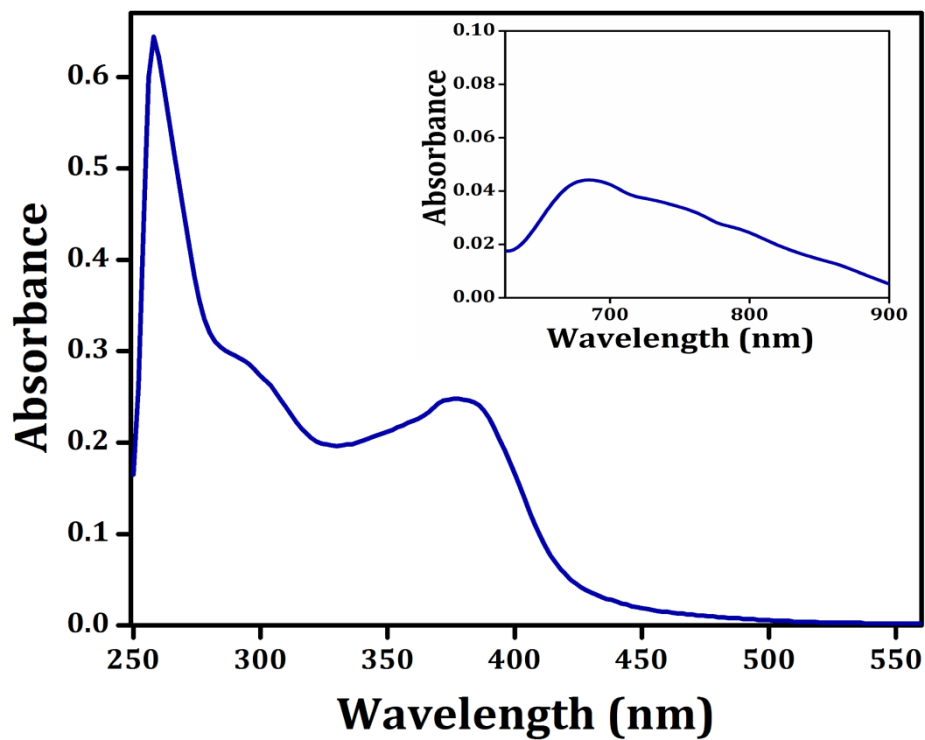

**Fig. S7** UV-visible spectral plot of complex 1 solution [ $5 \times 10^{-5}$  (M)]. Inset shows the d-d transition for [ $5 \times 10^{-3}$  (M)] solution.

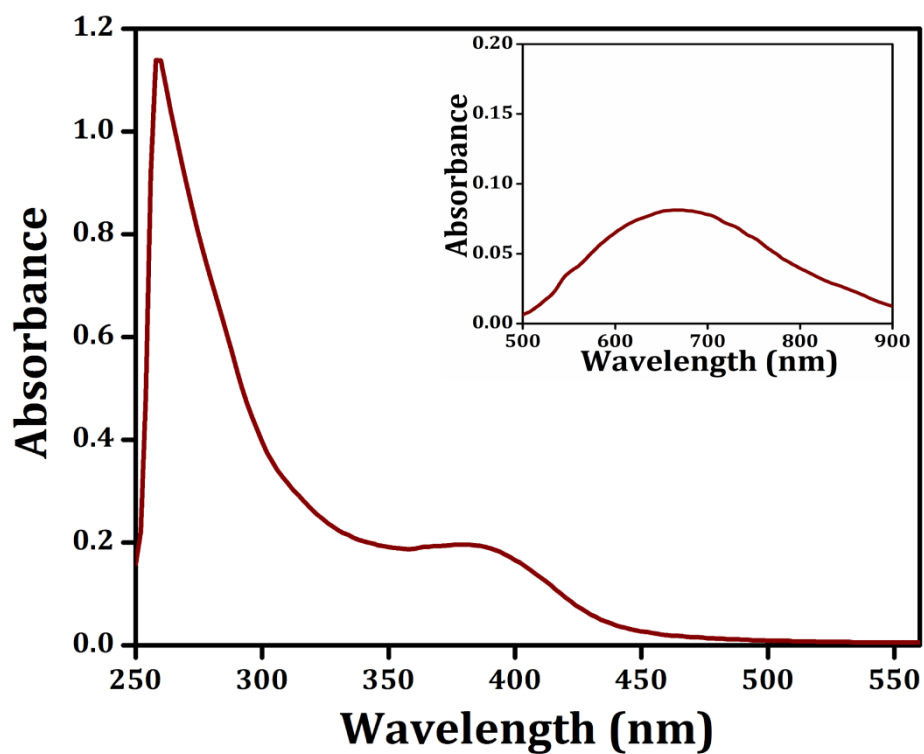

**Fig. S8** UV-visible spectral plot of complex 2 solution [ $5 \times 10^{-5}$  (M)]. Inset shows the d-d transition for [ $5 \times 10^{-3}$  (M)] solution.



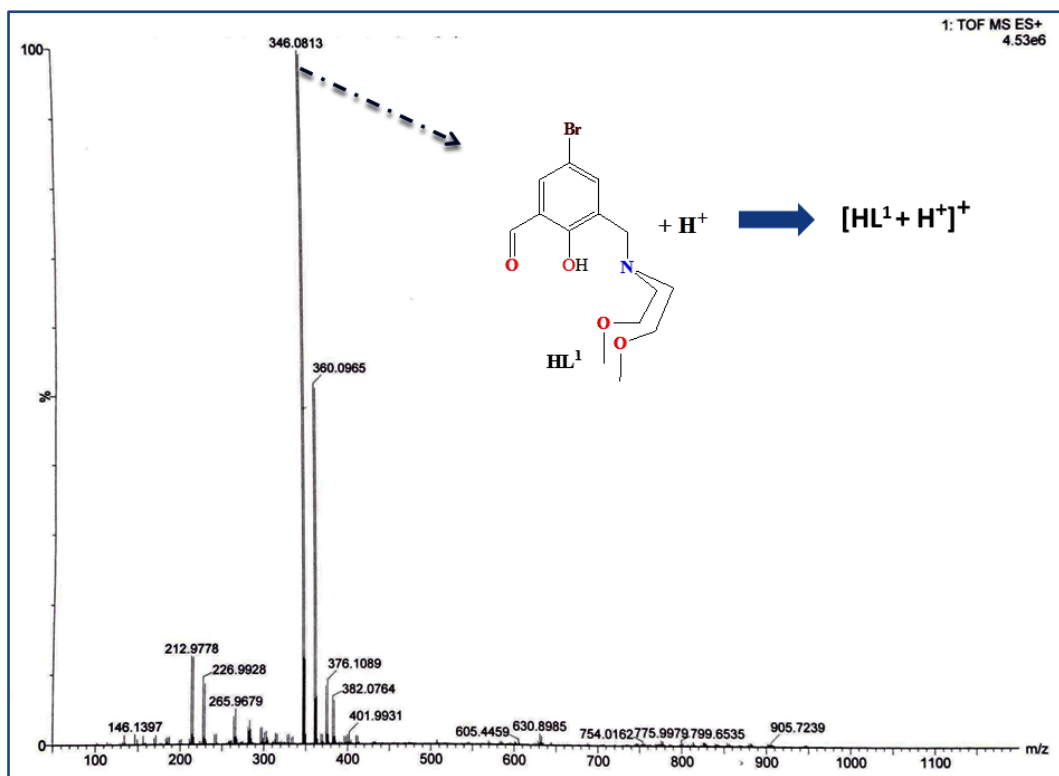

Fig. S9 ESI-MS spectrum of ligand HL<sup>1</sup>.

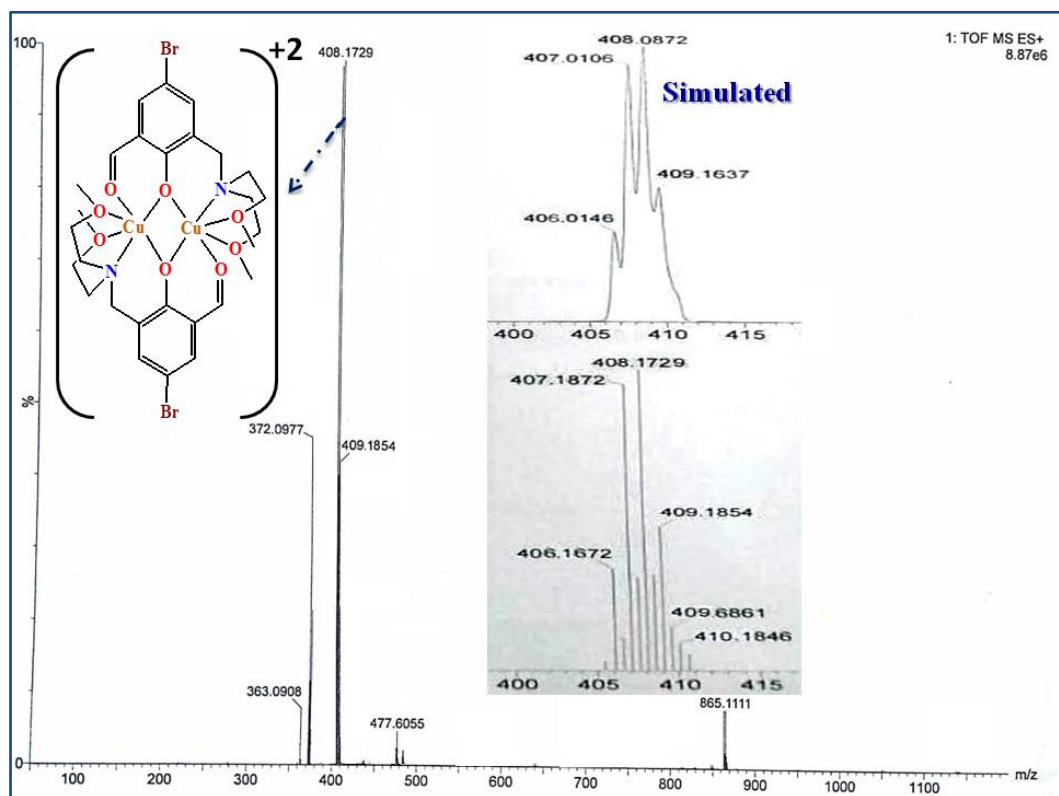

Fig. S10 ESI-MS spectrum of complex 1.

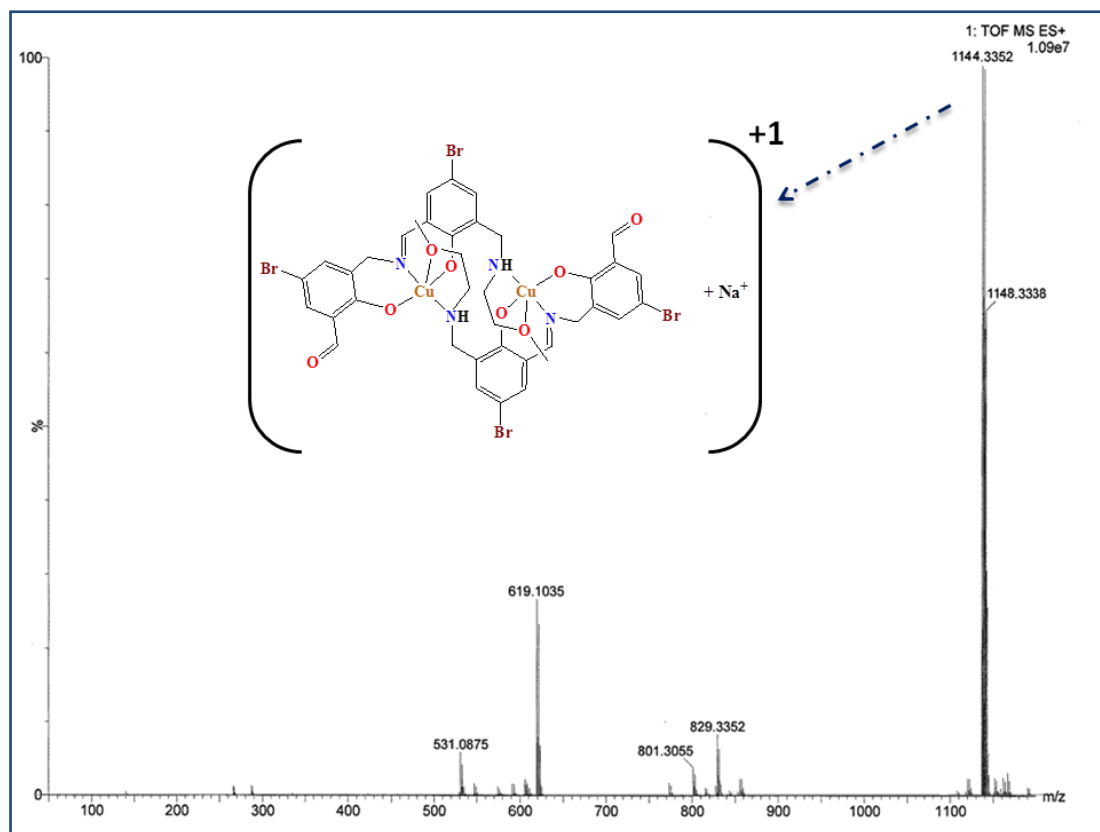

**Fig. S11** ESI-MS spectrum of complex **2**.

**Table S1:** Coordination bond lengths (Å) and angles (°) for complex **1**.

| Bond distances |            |           |            |
|----------------|------------|-----------|------------|
| Cu1-O1         | 1.964(4)   | Cu2-O1    | 1.923(4)   |
| Cu1-O3         | 2.335(5)   | Cu2-O2    | 1.979(5)   |
| Cu1-O4         | 2.252(5)   | Cu2-O5    | 1.956(4)   |
| Cu1-O5         | 1.915(4)   | Cu2-O7    | 2.425(5)   |
| Cu1-O6         | 1.984(5)   | Cu2-O8    | 2.223(6)   |
| Cu1-N1         | 1.999(5)   | Cu2-N2    | 1.986(6)   |
| Bond Angles    |            |           |            |
| O1-Cu1-O3      | 93.97(19)  | O1-Cu2-O2 | 91.80(19)  |
| O1-Cu1-O4      | 105.71(19) | O1-Cu2-O5 | 78.29(17)  |
| O1-Cu1-O5      | 78.29(17)  | O1-Cu2-O7 | 108.98(19) |
| O1-Cu1-O6      | 167.20(19) | O1-Cu2-O8 | 96.7(2)    |
| O1-Cu1-N1      | 94.7(2)    | O1-Cu2-N2 | 170.2(2)   |
| O3-Cu1-O4      | 150.9(2)   | O2-Cu2-O5 | 166.9(2)   |
| O3-Cu1-O5      | 106.04(19) | O2-Cu2-O7 | 78.61(19)  |

|           |           |           |           |
|-----------|-----------|-----------|-----------|
| O3-Cu1-O6 | 81.5(2)   | O2-Cu2-O8 | 81.4(2)   |
| O3-Cu1-N1 | 79.8(2)   | O2-Cu2-N2 | 95.9(2)   |
| O4-Cu1-O5 | 98.9(2)   | O5-Cu2-O7 | 96.37(19) |
| O4-Cu1-O6 | 83.1(2)   | O5-Cu2-O8 | 108.1(2)  |
| O4-Cu1-N1 | 77.4(2)   | O5-Cu2-N2 | 95.0(2)   |
| O5-Cu1-O6 | 91.37(18) | O7-Cu2-O8 | 147.6(2)  |
| O5-Cu1-N1 | 171.0(2)  | O7-Cu2-N2 | 78.6(2)   |
| O6-Cu1-N1 | 96.3(2)   | O8-Cu2-N2 | 78.5(3)   |

**Table S2:** Hydrogen bonding parameters of complex **1**.

| D-H...A         | D-H(Å) | H...A(Å) | D...A(Å)  | <D-H...A (°) | Symmetry code        |
|-----------------|--------|----------|-----------|--------------|----------------------|
| O9-H9c...O10    | 0.85   | 2.13     | 2.93(2)   | 157          | -                    |
| O9-H9c...O13b   | 0.85   | 2.01     | 2.78(3)   | 150          | -                    |
| O9-H9d...O16    | 0.85   | 2.28     | 3.033(14) | 148          | -                    |
| C6-H6...O12b    | 0.93   | 2.51     | 3.34(2)   | 149          | $x, 3/2-y, -1/2+z$   |
| C8-H8a...O4     | 0.97   | 2.56     | 3.090(9)  | 114          | -                    |
| C9-H9b...O18    | 0.97   | 2.54     | 3.49(3)   | 167          | -                    |
| C9-H9b...O19    | 0.97   | 2.44     | 3.34(6)   | 153          | -                    |
| C11-H11b...O6   | 0.97   | 2.43     | 2.953(9)  | 113          | -                    |
| C13-H13b...O12b | 0.96   | 2.50     | 3.32(3)   | 143          | $2-x, -1/2+y, 3/2-z$ |
| C20-H20...O17   | 0.93   | 2.54     | 3.316(12) | 141          | $1-x, 1-y, 2-z$      |
| C22-H22a...O8   | 0.97   | 2.55     | 3.079(10) | 114          | -                    |
| C24-H24b...O2   | 0.97   | 2.54     | 3.025(10) | 111          | -                    |
| C25-H25a...O9   | 0.97   | 2.31     | 3.261(14) | 166          | $1-x, 1-y, 2-z$      |
| C25-H25b...O2   | 0.97   | 2.45     | 2.929(11) | 110          | -                    |
| C28-H28a...Br1  | 0.96   | 2.81     | 3.558(11) | 135          | $1-x, 1-y, 1-z$      |
| C28-H28c...O13  | 0.96   | 2.59     | 3.49(2)   | 155          | $1-x, -1/2+y, 3/2-z$ |



**Table S3:** Coordination bond lengths (Å) and angles (°) for complex **2**.

| Bond Distances |          | Bond Angles |          |             |          |
|----------------|----------|-------------|----------|-------------|----------|
| Cu1-O1         | 1.918(7) | O1-Cu1-O2   | 161.6(3) | O2-Cu1-O4'  | 100.0(3) |
| Cu1-O2         | 1.924(7) | O1-Cu1-N1   | 92.1(3)  | O2-Cu1-N2'  | 90.5(3)  |
| Cu1-O4'        | 2.413(8) | O1-Cu1-O4   | 97.2(3)  | O4'-Cu1-N1  | 90.9(3)  |
| Cu1-N1         | 1.952(8) | O1-Cu1-N2'  | 86.3(3)  | O4'-Cu1-N2' | 78.7(3)  |
| Cu1-N2'        | 2.019(8) | O2-Cu1-N1   | 94.3(3)  | N1-Cu1-N2'  | 169.1(3) |

Primed atoms at  $-x+1/2, -y+3/2, -z+1$ .

**Table S4:** Hydrogen bonding parameters of complex **2**.

| D-H...A        | D-H(Å) | H...A(Å) | D...A(Å)  | <D-H...A (°) | Symmetry code          |
|----------------|--------|----------|-----------|--------------|------------------------|
| N2-H2...O1     | 0.98   | 2.20     | 2.898(11) | 127          | -                      |
| C7-H7...O3     | 0.93   | 2.57     | 3.249(15) | 130          | $1/2-x, -1/2+y, 1/2-z$ |
| C15-H15...O2   | 0.93   | 2.47     | 2.811(17) | 102          | -                      |
| C16-H16b...Br1 | 0.97   | 2.89     | 3.614(10) | 132          | $1-x, 1-y, 1-z$        |

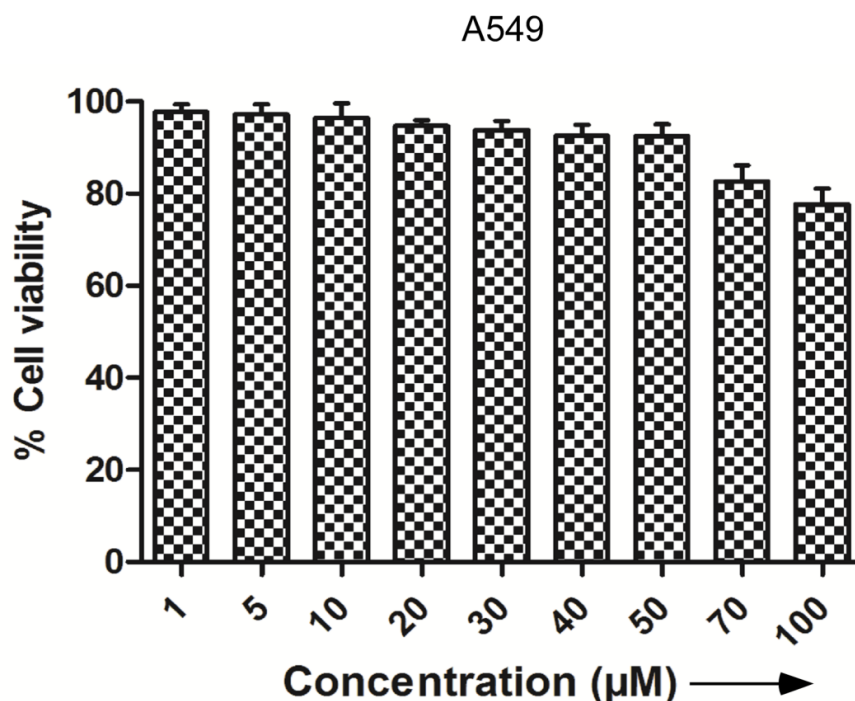**Fig. S12** Anti-proliferative activity of ligand HL<sup>1</sup> on A549 cell line. At 70 µM concentration HL<sup>1</sup> inhibits the cell viability by 17% and at the highest dose of 100 µM the cell viability was prevented by 22%.

## Table S5: Theoretical calculations.

### XYZ Coordinates of the Optimized Structures

#### L1

Charge = 0, Multiplicity = 1

|   |              |              |              |   |              |              |              |
|---|--------------|--------------|--------------|---|--------------|--------------|--------------|
| C | 2.970825000  | -0.845522000 | 0.380639000  | C | -1.234781000 | 1.232138000  | -0.887934000 |
| C | 1.663404000  | -1.185563000 | -0.083343000 | H | -0.652167000 | 1.583888000  | -1.760439000 |
| C | 1.143113000  | -0.589597000 | -1.266549000 | H | -2.252596000 | 1.642409000  | -1.009573000 |
| C | 1.950783000  | 0.314619000  | -1.970210000 | C | -3.442162000 | -0.597700000 | 0.337988000  |
| C | 3.250919000  | 0.657200000  | -1.533515000 | H | -2.902076000 | -1.056854000 | 1.192743000  |
| C | 3.746244000  | 0.083516000  | -0.366032000 | H | -3.554169000 | 0.484660000  | 0.563275000  |
| H | 1.551148000  | 0.768695000  | -2.881943000 | C | -0.615501000 | 1.817800000  | 0.392787000  |
| H | 3.852895000  | 1.367781000  | -2.104792000 | H | -1.215319000 | 1.508149000  | 1.275445000  |
| H | 4.741988000  | 0.327571000  | 0.011765000  | H | 0.410542000  | 1.421403000  | 0.535403000  |
| O | 0.833262000  | -2.081149000 | 0.542837000  | C | -0.003935000 | 3.890189000  | 1.394211000  |
| C | -0.279529000 | -0.898916000 | -1.711830000 | H | -0.027571000 | 4.973896000  | 1.200768000  |
| H | -0.400582000 | -0.598233000 | -2.776951000 | H | -0.565466000 | 3.677620000  | 2.327927000  |
| H | -0.450367000 | -1.985692000 | -1.656079000 | H | 1.049089000  | 3.572351000  | 1.543871000  |
| C | 3.542325000  | -1.407895000 | 1.617736000  | C | -5.571209000 | -1.060305000 | 1.299657000  |
| H | 2.887525000  | -2.113474000 | 2.194911000  | H | -6.526824000 | -1.552735000 | 1.062128000  |
| O | 4.669791000  | -1.151527000 | 2.059422000  | H | -5.128922000 | -1.542021000 | 2.196413000  |
| N | -1.277761000 | -0.248607000 | -0.829544000 | H | -5.763477000 | 0.006466000  | 1.538617000  |
| C | -2.632109000 | -0.814900000 | -0.952796000 | O | -0.596193000 | 3.247868000  | 0.258521000  |
| H | -3.201716000 | -0.401250000 | -1.815752000 | O | -4.729352000 | -1.204374000 | 0.148443000  |
| H | -2.543989000 | -1.901444000 | -1.115550000 | H | 1.286014000  | -2.499863000 | 1.305992000  |

#### TS1

Charge = -1, Multiplicity = 1

|   |             |              |              |   |              |              |              |
|---|-------------|--------------|--------------|---|--------------|--------------|--------------|
| C | 3.299122000 | -0.732898000 | 0.303009000  | H | 5.062026000  | 0.369630000  | -0.276033000 |
| C | 1.959982000 | -1.203370000 | -0.060660000 | O | 1.201045000  | -1.875578000 | 0.739481000  |
| C | 1.494886000 | -0.831246000 | -1.401694000 | C | 0.124617000  | -1.322965000 | -1.830194000 |
| C | 2.288396000 | -0.058807000 | -2.245872000 | H | -0.147259000 | -0.928669000 | -2.824371000 |
| C | 3.586591000 | 0.386922000  | -1.865441000 | H | 0.120934000  | -2.432574000 | -1.902966000 |
| C | 4.070007000 | 0.043154000  | -0.606932000 | C | 3.840859000  | -1.059350000 | 1.614581000  |
| H | 1.900673000 | 0.211969000  | -3.236112000 | H | 3.154967000  | -1.671278000 | 2.251219000  |
| H | 4.184411000 | 0.988743000  | -2.555763000 | O | 4.963472000  | -0.721117000 | 2.055920000  |

|   |              |              |              |   |              |              |              |
|---|--------------|--------------|--------------|---|--------------|--------------|--------------|
| N | -0.925487000 | -0.906255000 | -0.854474000 | H | 0.292400000  | -0.363255000 | 2.575905000  |
| C | -2.258803000 | -1.470074000 | -1.140797000 | H | -0.186504000 | 1.221554000  | 3.306525000  |
| H | -2.683994000 | -0.951773000 | -2.018962000 | C | -5.430108000 | -1.869520000 | 0.719759000  |
| H | -2.188787000 | -2.546716000 | -1.400997000 | H | -6.336284000 | -2.367759000 | 0.342290000  |
| C | -1.000300000 | 1.352376000  | -0.727496000 | H | -5.093417000 | -2.382476000 | 1.644591000  |
| H | -2.070275000 | 1.225236000  | -0.839905000 | H | -5.674408000 | -0.817669000 | 0.975817000  |
| C | -3.209947000 | -1.325023000 | 0.057783000  | O | -1.239374000 | 0.654620000  | 1.557859000  |
| H | -2.774135000 | -1.818164000 | 0.953228000  | O | -4.446610000 | -1.948864000 | -0.320458000 |
| H | -3.364249000 | -0.261924000 | 0.324772000  | H | -0.366746000 | 1.326435000  | -1.605835000 |
| C | -0.379972000 | 1.371655000  | 0.649176000  | N | -1.329453000 | 3.366453000  | -1.205613000 |
| H | 0.621700000  | 0.909878000  | 0.598672000  | N | -1.274090000 | 4.062601000  | -0.210170000 |
| H | -0.237646000 | 2.405782000  | 1.028414000  | N | -1.205940000 | 4.738770000  | 0.762378000  |
| C | -0.555766000 | 0.317998000  | 2.779063000  | H | -0.580843000 | -1.221401000 | 0.069133000  |
| H | -1.293413000 | -0.192158000 | 3.417397000  |   |              |              |              |

## L2

Charge = -1, Multiplicity = 1

|   |              |              |              |   |              |              |              |
|---|--------------|--------------|--------------|---|--------------|--------------|--------------|
| C | 3.092058000  | 0.282147000  | -0.148854000 | O | 5.168627000  | 1.333804000  | -0.812114000 |
| C | 1.777014000  | 0.527365000  | 0.475119000  | N | -1.478722000 | -0.164239000 | 0.097613000  |
| C | 0.903527000  | -0.656900000 | 0.585301000  | C | -2.860564000 | -0.135283000 | 0.613925000  |
| C | 1.327359000  | -1.901456000 | 0.128830000  | H | -3.178843000 | -1.089897000 | 1.095118000  |
| C | 2.605631000  | -2.105259000 | -0.471529000 | H | -2.924217000 | 0.646740000  | 1.392063000  |
| C | 3.460623000  | -1.016379000 | -0.601905000 | C | -3.847834000 | 0.205510000  | -0.511608000 |
| H | 0.650026000  | -2.759888000 | 0.235607000  | H | -3.592231000 | 1.190097000  | -0.956975000 |
| H | 2.898926000  | -3.101058000 | -0.817515000 | H | -3.783127000 | -0.550978000 | -1.325575000 |
| H | 4.451568000  | -1.128641000 | -1.057404000 | C | -6.170301000 | 0.533949000  | -0.927516000 |
| O | 1.409877000  | 1.673266000  | 0.906469000  | H | -7.141125000 | 0.525517000  | -0.408070000 |
| C | -0.484924000 | -0.481471000 | 1.166955000  | H | -6.010251000 | 1.535652000  | -1.378360000 |
| H | -0.779503000 | -1.391864000 | 1.740031000  | H | -6.192760000 | -0.214432000 | -1.747306000 |
| H | -0.480078000 | 0.370282000  | 1.867942000  | O | -5.170152000 | 0.223204000  | 0.050289000  |
| C | 4.021554000  | 1.386601000  | -0.302734000 | H | -1.411751000 | -0.918702000 | -0.600968000 |
| H | 3.632740000  | 2.361701000  | 0.085071000  |   |              |              |              |

## P1

Charge = 0, Multiplicity = 1

|   |             |             |              |   |              |             |             |
|---|-------------|-------------|--------------|---|--------------|-------------|-------------|
| C | 0.274629000 | 0.970572000 | -0.239551000 | H | -0.038727000 | 1.989244000 | 0.026662000 |
|---|-------------|-------------|--------------|---|--------------|-------------|-------------|

|   |              |              |              |
|---|--------------|--------------|--------------|
| H | 0.351813000  | 0.904091000  | -1.338487000 |
| C | -0.756554000 | -0.047995000 | 0.283061000  |
| H | -0.436381000 | -1.081126000 | 0.027970000  |
| H | -0.828088000 | 0.017750000  | 1.388793000  |
| C | -3.060563000 | -0.607636000 | 0.065867000  |
| H | -3.968636000 | -0.278776000 | -0.461533000 |

|   |              |              |              |
|---|--------------|--------------|--------------|
| H | -2.842813000 | -1.660597000 | -0.206252000 |
| H | -3.236523000 | -0.557306000 | 1.159728000  |
| O | -2.002980000 | 0.274695000  | -0.342007000 |
| N | 1.612827000  | 0.783306000  | 0.402618000  |
| N | 2.274142000  | -0.204458000 | 0.028622000  |
| N | 3.009907000  | -1.067489000 | -0.219395000 |

## L2H

Charge = 0, Multiplicity = 1

|   |              |              |              |
|---|--------------|--------------|--------------|
| C | 2.991566000  | 0.357749000  | -0.112886000 |
| C | 1.685038000  | 0.346387000  | 0.466151000  |
| C | 0.923744000  | -0.854840000 | 0.497077000  |
| C | 1.486468000  | -2.018014000 | -0.048484000 |
| C | 2.778839000  | -2.029433000 | -0.621178000 |
| C | 3.516515000  | -0.849157000 | -0.650696000 |
| H | 0.899691000  | -2.941647000 | -0.021425000 |
| H | 3.188754000  | -2.953943000 | -1.034722000 |
| H | 4.517656000  | -0.812909000 | -1.086864000 |
| O | 1.082737000  | 1.444997000  | 1.027920000  |
| C | -0.486346000 | -0.864641000 | 1.064137000  |
| H | -0.745026000 | -1.899228000 | 1.382446000  |
| H | -0.539896000 | -0.227855000 | 1.963096000  |
| C | 3.813991000  | 1.579006000  | -0.188674000 |
| H | 3.356622000  | 2.517104000  | 0.224548000  |

|   |              |              |              |
|---|--------------|--------------|--------------|
| O | 4.950635000  | 1.640264000  | -0.675048000 |
| N | -1.444055000 | -0.313751000 | 0.070452000  |
| C | -2.837185000 | -0.347079000 | 0.559601000  |
| H | -3.194857000 | -1.369815000 | 0.818266000  |
| H | -2.894012000 | 0.254655000  | 1.484124000  |
| C | -3.781094000 | 0.263315000  | -0.486775000 |
| H | -3.475002000 | 1.307070000  | -0.709898000 |
| H | -3.724671000 | -0.308167000 | -1.440116000 |
| C | -6.077973000 | 0.772676000  | -0.856943000 |
| H | -7.059184000 | 0.697873000  | -0.363340000 |
| H | -5.866995000 | 1.838561000  | -1.083300000 |
| H | -6.111955000 | 0.214801000  | -1.815977000 |
| O | -5.112942000 | 0.219096000  | 0.046995000  |
| H | 1.694480000  | 2.211902000  | 1.035212000  |
| H | -1.382035000 | -0.902813000 | -0.772133000 |

## TS2

Charge = -1, Multiplicity = 1

|   |              |              |              |
|---|--------------|--------------|--------------|
| C | -3.691586000 | -0.435094000 | -0.139768000 |
| C | -2.247110000 | -0.660751000 | -0.008323000 |
| C | -1.517361000 | 0.338613000  | 0.784021000  |
| C | -2.170702000 | 1.434302000  | 1.339494000  |
| C | -3.574316000 | 1.632423000  | 1.187105000  |
| C | -4.307597000 | 0.700043000  | 0.459598000  |
| H | -1.588503000 | 2.163025000  | 1.918297000  |
| H | -4.058431000 | 2.502376000  | 1.640456000  |
| H | -5.388490000 | 0.817143000  | 0.322338000  |
| O | -1.628306000 | -1.653440000 | -0.546101000 |

|   |              |              |              |
|---|--------------|--------------|--------------|
| C | -0.028135000 | 0.108412000  | 0.968084000  |
| H | 0.428003000  | 0.903479000  | 1.580344000  |
| H | 0.153080000  | -0.856021000 | 1.476229000  |
| C | -4.495699000 | -1.377616000 | -0.901556000 |
| H | -3.911148000 | -2.227760000 | -1.334014000 |
| O | -5.731873000 | -1.308311000 | -1.099817000 |
| N | 0.710498000  | 0.026798000  | -0.328441000 |
| C | 2.872673000  | -0.325173000 | -0.234321000 |
| H | 2.762158000  | -0.663076000 | -1.258814000 |
| C | 3.157700000  | 1.140023000  | 0.040053000  |

|   |             |             |              |   |             |              |              |
|---|-------------|-------------|--------------|---|-------------|--------------|--------------|
| H | 2.627262000 | 1.465492000 | 0.958324000  | H | 2.633188000 | -1.004822000 | 0.578648000  |
| H | 4.239910000 | 1.287562000 | 0.214198000  | N | 4.815697000 | -0.997366000 | -0.287293000 |
| C | 2.971879000 | 3.315960000 | -0.913210000 | N | 4.872068000 | -2.041992000 | 0.340281000  |
| H | 2.617281000 | 3.820284000 | -1.824483000 | N | 4.938763000 | -3.054795000 | 0.950832000  |
| H | 2.419707000 | 3.715744000 | -0.038170000 | H | 0.631177000 | 0.905835000  | -0.854983000 |
| H | 4.050920000 | 3.531160000 | -0.774149000 | H | 0.249973000 | -0.724064000 | -0.869148000 |
| O | 2.729709000 | 1.912785000 | -1.097805000 |   |             |              |              |

### L3

Charge = -1, Multiplicity = 1

|   |              |              |              |   |              |              |              |
|---|--------------|--------------|--------------|---|--------------|--------------|--------------|
| C | 1.245126000  | -0.085573000 | -0.021293000 | C | -2.613586000 | -0.066010000 | -0.410595000 |
| C | -0.124276000 | -0.594116000 | -0.195070000 | H | -3.303805000 | 0.789999000  | -0.521036000 |
| C | -1.185664000 | 0.425944000  | -0.230217000 | H | -2.684503000 | -0.666762000 | -1.336238000 |
| C | -0.879977000 | 1.774947000  | -0.086576000 | C | 2.353957000  | -1.021805000 | 0.015239000  |
| C | 0.458615000  | 2.240517000  | 0.090962000  | H | 2.046415000  | -2.091962000 | -0.098706000 |
| C | 1.492142000  | 1.311624000  | 0.118153000  | O | 3.568755000  | -0.736981000 | 0.158314000  |
| H | -1.696893000 | 2.508753000  | -0.115976000 | N | -3.127736000 | -0.944661000 | 0.692343000  |
| H | 0.657983000  | 3.311181000  | 0.199296000  | H | -2.977130000 | -0.432488000 | 1.575457000  |
| H | 2.532897000  | 1.629066000  | 0.249846000  | H | -2.444212000 | -1.717222000 | 0.734595000  |
| O | -0.408082000 | -1.841908000 | -0.310470000 |   |              |              |              |

### Complex 1

Charge = 1 Multiplicity = 2

|   |              |              |              |   |              |              |              |
|---|--------------|--------------|--------------|---|--------------|--------------|--------------|
| C | 2.981604000  | -0.389694000 | -0.365484000 | C | 3.304653000  | -1.821029000 | -0.547327000 |
| C | 1.663373000  | 0.093045000  | -0.691275000 | H | 2.461854000  | -2.450840000 | -0.916566000 |
| C | 1.359610000  | 1.484486000  | -0.459612000 | O | 4.409735000  | -2.322778000 | -0.299150000 |
| C | 2.348818000  | 2.321734000  | 0.072038000  | N | -1.149417000 | 1.326264000  | -0.071024000 |
| C | 3.650571000  | 1.847176000  | 0.359370000  | C | -2.485226000 | 1.727230000  | -0.631211000 |
| C | 3.956477000  | 0.501202000  | 0.136450000  | H | -2.800496000 | 2.711877000  | -0.241672000 |
| H | 2.106277000  | 3.371567000  | 0.261176000  | H | -2.358749000 | 1.808713000  | -1.720291000 |
| H | 4.403836000  | 2.530779000  | 0.756872000  | C | -1.022557000 | 1.419767000  | 1.422061000  |
| H | 4.950289000  | 0.102618000  | 0.355259000  | H | 0.037275000  | 1.598691000  | 1.643304000  |
| O | 0.758266000  | -0.743277000 | -1.184629000 | H | -1.597529000 | 2.281228000  | 1.804367000  |
| C | -0.016103000 | 2.022193000  | -0.805525000 | C | -3.576356000 | 0.689710000  | -0.337452000 |
| H | -0.062741000 | 3.105526000  | -0.596347000 | H | -3.867183000 | 0.671938000  | 0.724311000  |
| H | -0.219994000 | 1.866365000  | -1.876520000 | H | -4.472034000 | 0.902110000  | -0.943136000 |

|   |              |              |             |
|---|--------------|--------------|-------------|
| C | -1.475891000 | 0.133771000  | 2.163077000 |
| H | -1.216477000 | 0.230915000  | 3.230661000 |
| H | -2.557571000 | -0.027104000 | 2.086399000 |
| C | 0.453841000  | -1.365779000 | 2.118444000 |
| H | 0.802982000  | -2.237343000 | 1.550421000 |
| H | 1.148942000  | -0.525674000 | 1.956917000 |
| H | 0.393206000  | -1.604062000 | 3.193029000 |

|    |              |              |              |
|----|--------------|--------------|--------------|
| C  | -3.914563000 | -1.742234000 | -0.330778000 |
| H  | -3.427786000 | -2.647182000 | -0.714684000 |
| H  | -4.004041000 | -1.789085000 | 0.766869000  |
| H  | -4.905159000 | -1.613379000 | -0.793837000 |
| O  | -0.877919000 | -1.066363000 | 1.607512000  |
| O  | -3.052762000 | -0.627276000 | -0.717633000 |
| Cu | -1.035760000 | -0.724945000 | -0.617063000 |

## TS3

Charge = 0 Multiplicity = 2

|   |              |              |              |
|---|--------------|--------------|--------------|
| C | 3.228220000  | -0.306004000 | 0.299406000  |
| C | 2.006912000  | -0.737099000 | -0.331586000 |
| C | 1.618424000  | -0.102260000 | -1.568620000 |
| C | 2.427423000  | 0.907526000  | -2.105514000 |
| C | 3.633314000  | 1.317791000  | -1.486833000 |
| C | 4.023299000  | 0.706846000  | -0.296747000 |
| H | 2.115679000  | 1.389066000  | -3.038374000 |
| H | 4.241146000  | 2.104816000  | -1.939934000 |
| H | 4.942530000  | 0.998819000  | 0.218742000  |
| O | 1.273898000  | -1.698577000 | 0.232112000  |
| C | 0.349078000  | -0.541855000 | -2.284286000 |
| H | 0.202003000  | 0.079920000  | -3.189841000 |
| H | 0.445716000  | -1.590953000 | -2.636718000 |
| C | 3.640170000  | -0.897061000 | 1.582281000  |
| H | 2.936067000  | -1.658758000 | 1.994806000  |
| O | 4.675618000  | -0.599058000 | 2.202537000  |
| N | -0.847645000 | -0.440054000 | -1.421268000 |
| C | -2.077917000 | -0.941764000 | -2.061746000 |
| H | -2.462936000 | -0.213518000 | -2.803654000 |
| H | -1.878297000 | -1.887586000 | -2.603812000 |
| C | -1.134678000 | 1.664820000  | -0.706041000 |
| H | -2.188405000 | 1.503069000  | -0.893977000 |

|    |              |              |              |
|----|--------------|--------------|--------------|
| C  | -3.150070000 | -1.183033000 | -0.992139000 |
| H  | -3.411840000 | -0.251486000 | -0.464284000 |
| H  | -4.059391000 | -1.634137000 | -1.421220000 |
| C  | -0.570400000 | 1.458871000  | 0.678875000  |
| H  | 0.508673000  | 1.237726000  | 0.622143000  |
| H  | -0.699460000 | 2.361755000  | 1.305256000  |
| C  | -0.927043000 | 0.308042000  | 2.762374000  |
| H  | -1.486187000 | -0.543799000 | 3.173005000  |
| H  | 0.157105000  | 0.138687000  | 2.897284000  |
| H  | -1.226840000 | 1.238728000  | 3.276227000  |
| C  | -3.397498000 | -2.257231000 | 1.185570000  |
| H  | -2.872338000 | -2.972764000 | 1.831334000  |
| H  | -3.494633000 | -1.282325000 | 1.691804000  |
| H  | -4.389995000 | -2.648822000 | 0.909657000  |
| O  | -1.265433000 | 0.367263000  | 1.352747000  |
| O  | -2.576808000 | -2.116784000 | -0.011841000 |
| Cu | -0.615653000 | -1.564046000 | 0.213228000  |
| H  | -0.475156000 | 1.909121000  | -1.528901000 |
| N  | -1.613121000 | 3.730421000  | -0.744768000 |
| N  | -1.818423000 | 4.110687000  | 0.392628000  |
| N  | -1.995541000 | 4.466305000  | 1.510898000  |

## P2

Charge = 0 Multiplicity = 2

|   |             |              |              |
|---|-------------|--------------|--------------|
| C | 3.177400000 | -0.335530000 | -0.162831000 |
| C | 1.986463000 | 0.425974000  | -0.462893000 |

|   |             |             |              |
|---|-------------|-------------|--------------|
| C | 1.960660000 | 1.820108000 | -0.085947000 |
| C | 3.064236000 | 2.379043000 | 0.565811000  |



|   |              |              |              |    |              |              |              |
|---|--------------|--------------|--------------|----|--------------|--------------|--------------|
| C | 4.231190000  | 1.626167000  | 0.858075000  | H  | -3.848489000 | 2.772022000  | -0.015919000 |
| C | 4.277696000  | 0.284482000  | 0.489365000  | C  | -0.687892000 | -2.808941000 | -0.569137000 |
| H | 3.027113000  | 3.436948000  | 0.849211000  | H  | 0.153470000  | -2.853811000 | -1.282204000 |
| H | 5.076509000  | 2.099771000  | 1.364359000  | H  | -1.295555000 | -3.726325000 | -0.654359000 |
| H | 5.157938000  | -0.331916000 | 0.694478000  | C  | -1.976010000 | -1.692661000 | -2.280449000 |
| O | 0.954905000  | -0.150797000 | -1.068930000 | H  | -2.644004000 | -0.830476000 | -2.405742000 |
| C | 0.742981000  | 2.656832000  | -0.440622000 | H  | -1.105468000 | -1.598069000 | -2.951498000 |
| H | 0.900175000  | 3.697597000  | -0.087908000 | H  | -2.521002000 | -2.628447000 | -2.487200000 |
| H | 0.640779000  | 2.723778000  | -1.551069000 | C  | -4.024397000 | 0.066175000  | 0.157422000  |
| C | 3.260288000  | -1.753171000 | -0.530374000 | H  | -3.810909000 | -0.946602000 | -0.203311000 |
| H | 2.361841000  | -2.151852000 | -1.059878000 | H  | -4.067164000 | 0.063123000  | 1.258983000  |
| O | 4.229223000  | -2.501320000 | -0.300191000 | H  | -4.977072000 | 0.435784000  | -0.258831000 |
| N | -0.496617000 | 2.126684000  | 0.155892000  | O  | -1.538514000 | -1.670602000 | -0.888176000 |
| C | -1.665287000 | 2.935195000  | -0.211075000 | O  | -2.930435000 | 0.902831000  | -0.305322000 |
| H | -1.607279000 | 3.946287000  | 0.245315000  | Cu | -0.865814000 | 0.306381000  | -0.449671000 |
| H | -1.742532000 | 3.089212000  | -1.312896000 | H  | 0.486555000  | -3.532108000 | 1.077548000  |
| C | -0.124144000 | -2.647397000 | 0.843778000  | N  | -1.208599000 | -2.590749000 | 1.875601000  |
| H | 0.518993000  | -1.754077000 | 0.893861000  | N  | -1.534729000 | -1.457764000 | 2.268748000  |
| C | -2.931685000 | 2.238885000  | 0.289809000  | N  | -1.924966000 | -0.469724000 | 2.738798000  |
| H | -2.911338000 | 2.133120000  | 1.389598000  |    |              |              |              |
